# Supplementary material for: Atomic-layered V2C MXene containing bismuth elements: 2D/0D and 2D/2D nanoarchitectonics for hydrogen evolution and nitrogen reduction reaction
Source: Royal Society of Chemistry journal article supplement (doi:10.1039/d3nr01144e), 2023-01-01
Supplement: d3nr01144e1.pdf [file d3nr01144e1.pdf]

## Supporting Information

### Atomic-Layered $V_2C$ MXene Containing Bismuth Elements: 2D/0D and 2D/2D Nanoarchitectonics for Hydrogen Evolution and Nitrogen Reduction Reaction

Sana Akir\*, Jalal Azadmanjiri, Nikolas Antonatos, Lukáš Děkanovský, Pradip Kumar Roy, Vlastimil Mazánek, Roussin Lontio Fomekong, Jakub Regner, Zdeněk Sofer\*

Department of Inorganic Chemistry, University of Chemistry and Technology Prague, Technická 5, 166 28 Prague 6, Czech Republic

Email: akirs@vscht.cz, zdenek.sofer@vscht.cz

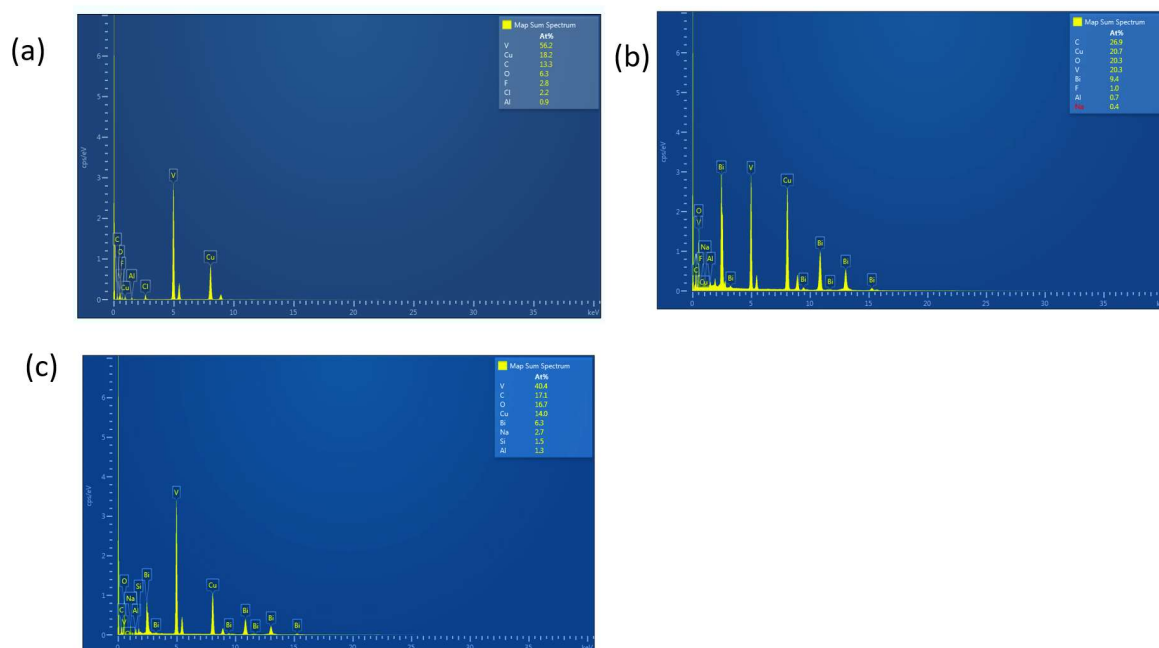

**Fig. S1** EDS of (a)  $V_2C$ , (b)  $V_2C/BVO$  and (c)  $V_2C/Bi$ .

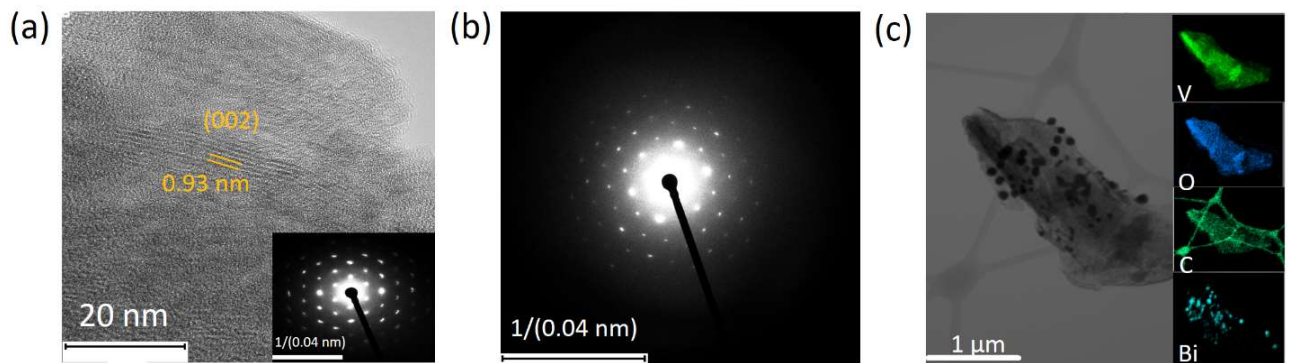

**Fig. S2** (a) HRTEM of  $V_2C$  (inset SAED of  $V_2C$ ), (b) SAED of  $V_2C/BVO$  and (c) the main elemental components mappings of V, O, C, and Bi of  $V_2C/Bi$ .

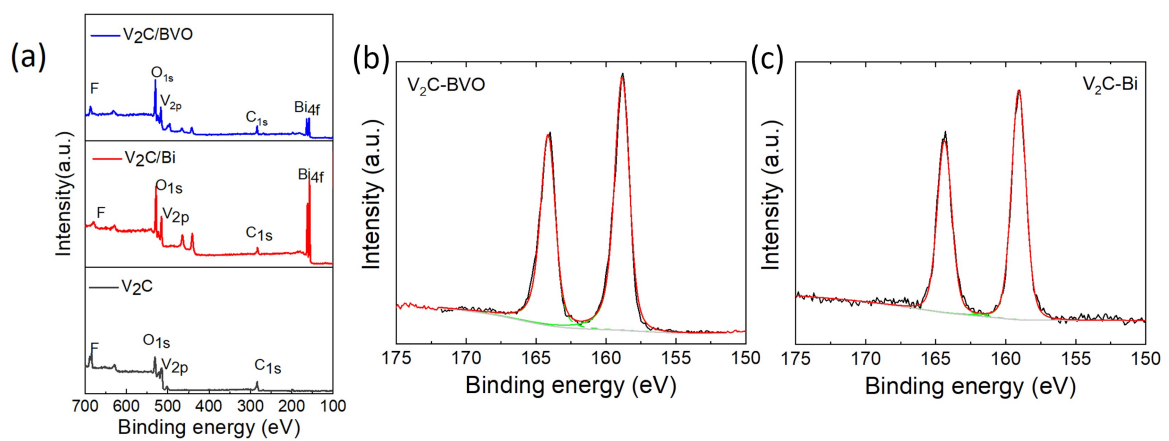

**Fig. S3** (a) XPS survey spectra of catalysts, high-resolution XPS spectra of Bi 4f in (b)  $V_2C/BVO$ , and (c)  $V_2C/Bi$ .

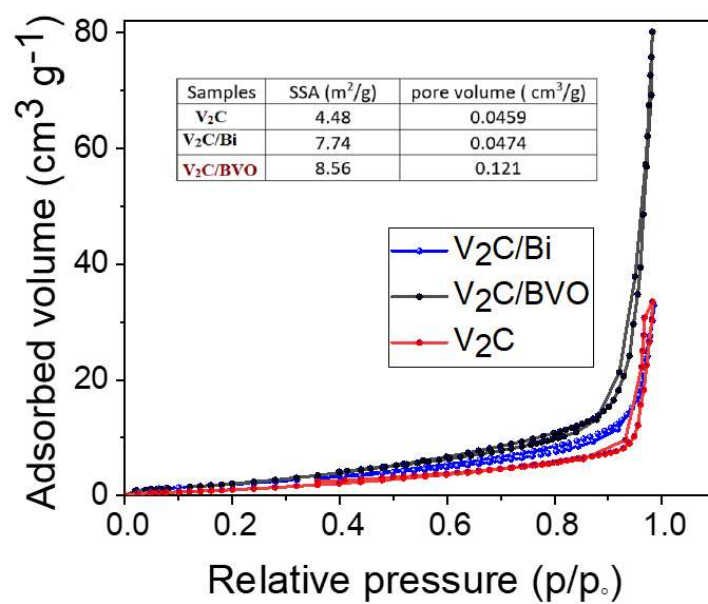

**Fig. S4** Nitrogen adsorption-desorption isotherms of V<sub>2</sub>C, V<sub>2</sub>C/BVO, and V<sub>2</sub>C/Bi, inset pore volume of catalysts.

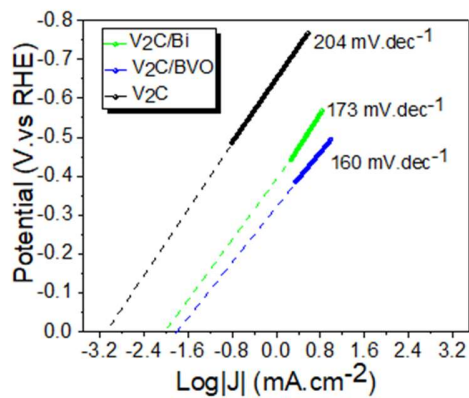

**Fig. S5** Extended linear Tafel plots to determine the exchange current density of catalysts.

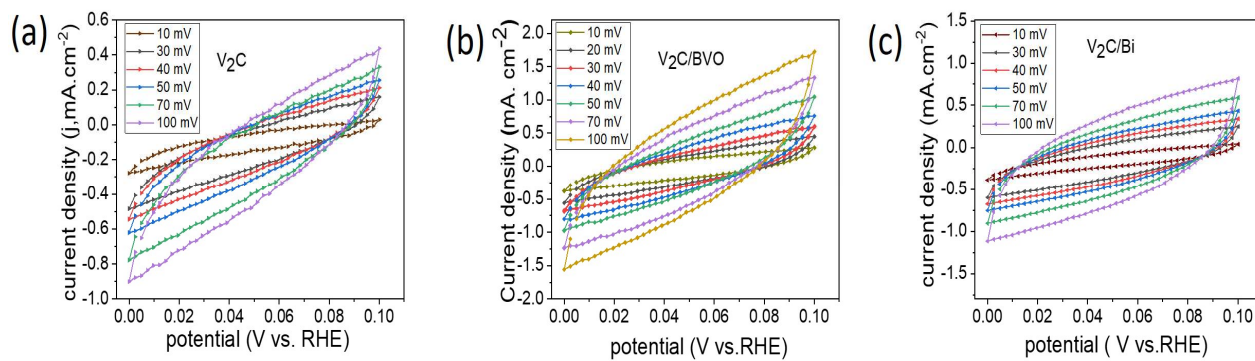

**Fig. S6** Cyclic voltammograms obtained from the non-Faradic Region of (a)  $V_2C$ , (b)  $V_2C/BVO$  and (c)  $V_2C/Bi$  at different scan rates in  $H_2SO_4$  (0.5M).

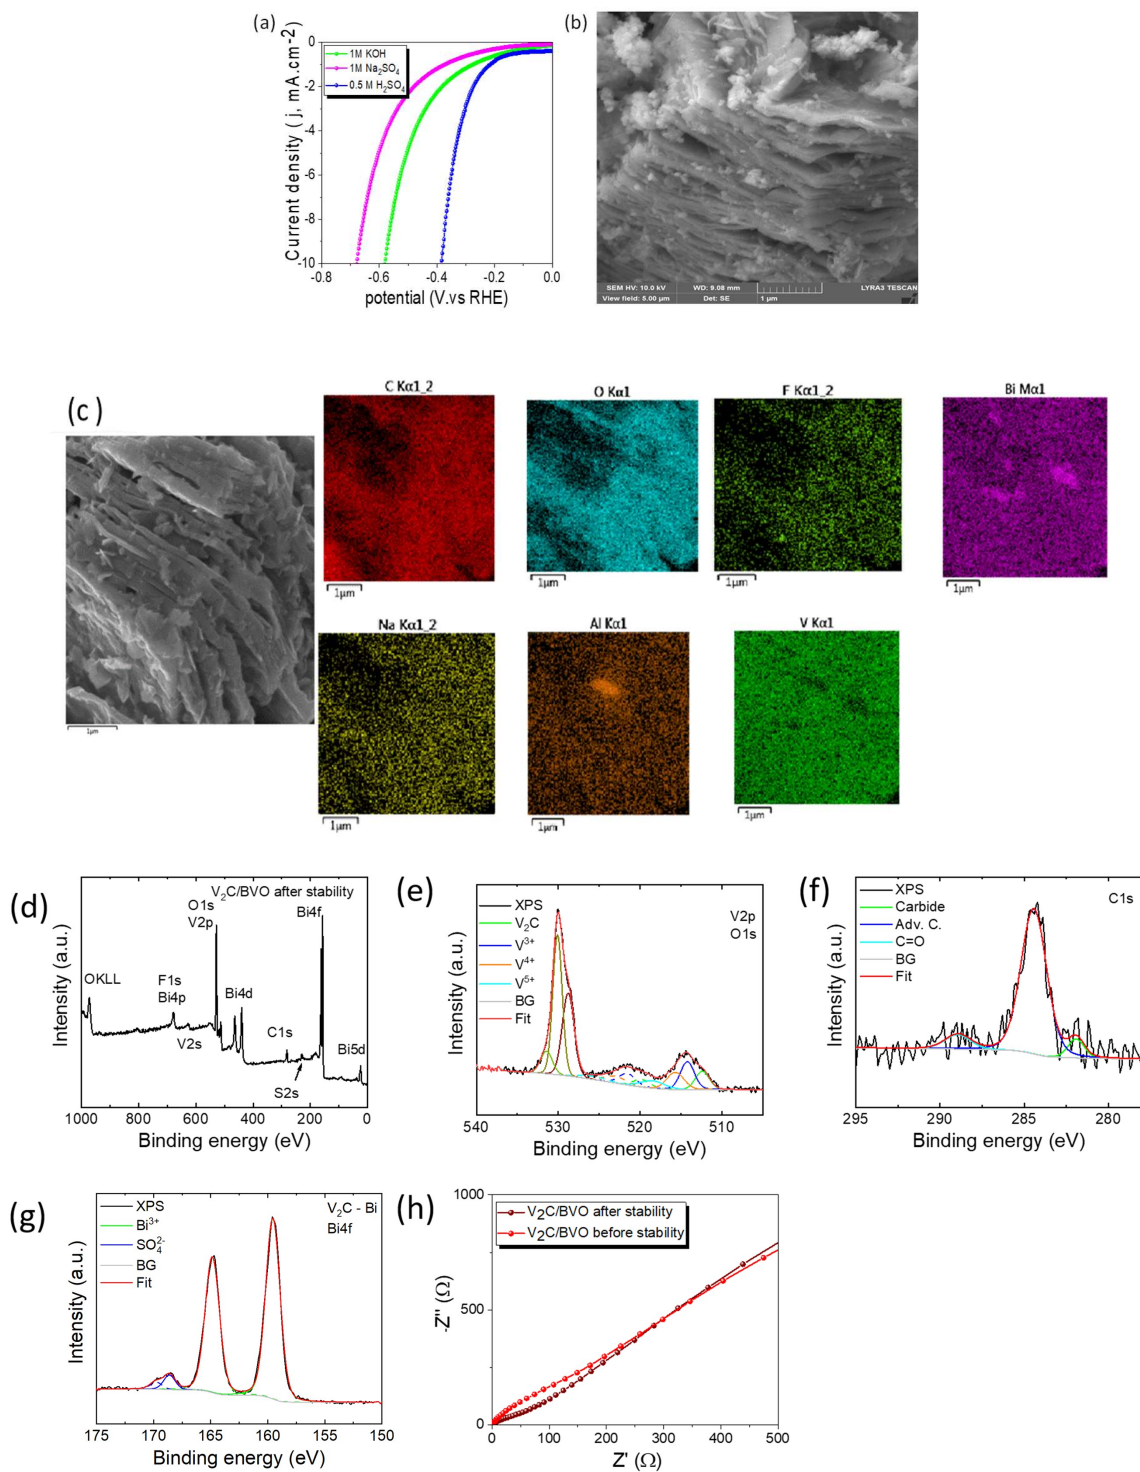

**Fig. S7** (a) Linear sweep voltammetry (LSV) measurements of  $V_2C/BVO$  in 1M KOH, 1 M  $\text{Na}_2\text{SO}_4$  and 0.5 M  $\text{H}_2\text{SO}_4$ , (b) SEM image of  $V_2C/BVO$  and (c) EDS elemental mapping of  $V_2C/BVO$  after stability test, (d) XPS survey spectra of  $V_2C/BVO$  after HER stability, High-resolution XPS spectra of  $V_2C/BVO$  after HER stability: (e) V2p, (f) C1s, and (g) Bi4f, (h) The Nyquist plots of  $V_2C/BVO$  before and after stability.

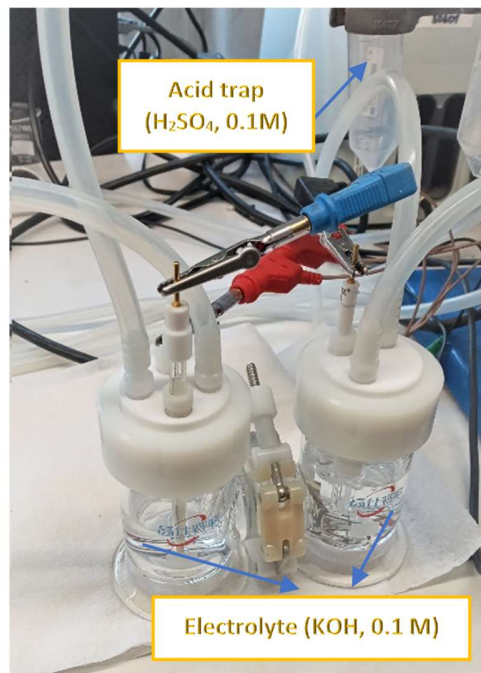

**Fig. S8** Photograph of H-type electrochemical cell.

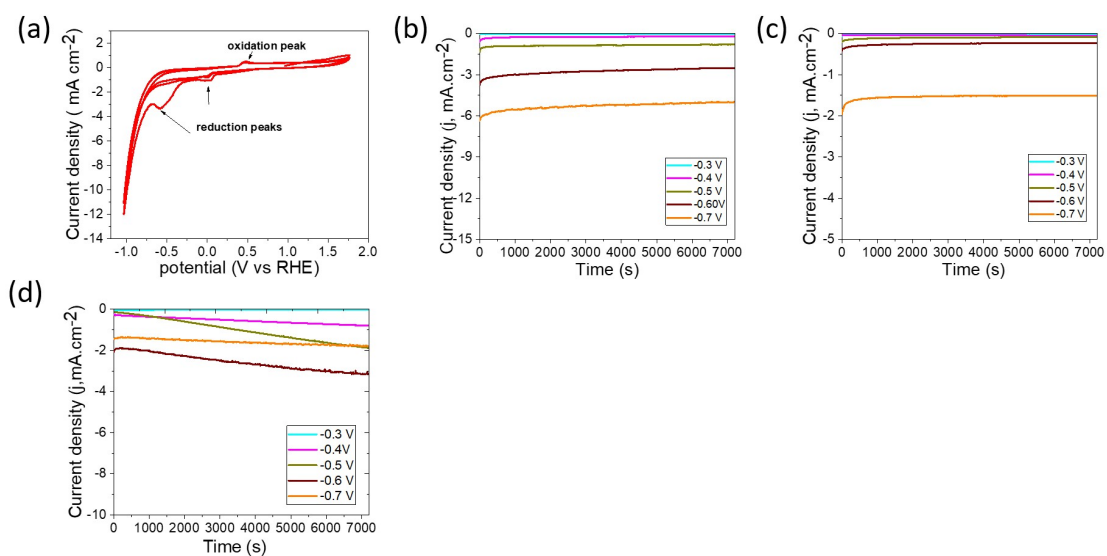

**Fig S9** (a) Three consecutive CV scans of V<sub>2</sub>C/Bi in 0.1 M KOH under N<sub>2</sub>, Chronoamperometry curves of diverse applied potentials for (b) V<sub>2</sub>C/Bi, (c) V<sub>2</sub>C/BVO and (d) V<sub>2</sub>C.

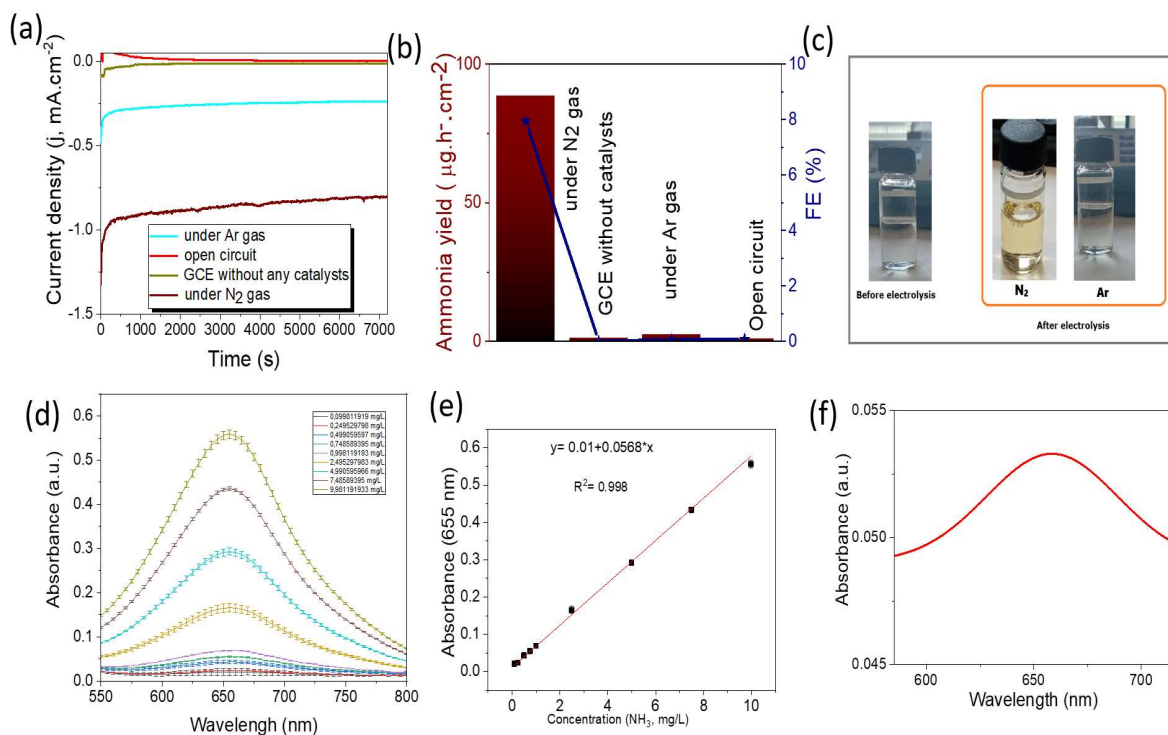

**Fig. 10** (a) Chronoamperometry curves of  $V_2C/Bi$  under different electrochemical conditions, (b) Ammonia yield and corresponding FE after 2h NRR under different conditions (c) images of a solution derived from an electrolyte before and after NRR test using  $N_2$  and Ar as feeding gas on the  $V_2C/Bi$  electrode detected using the  $NH_3$  color reagent, (d) UV-Vis curves of indophenol assays after incubated for 2 hours, (e) calibration curve used for estimation of  $NH_3$  concentration. The absorbance at 655 nm was measured by UV-Vis spectrophotometer, and the fitting curve shows good linear relation of absorbance with  $NH_3$  concentration ( $y = 0.0568x + 0.01$ ,  $R^2=0.998$ ), and (f) UV-vis absorption spectra of  $NH_3$  concentration.



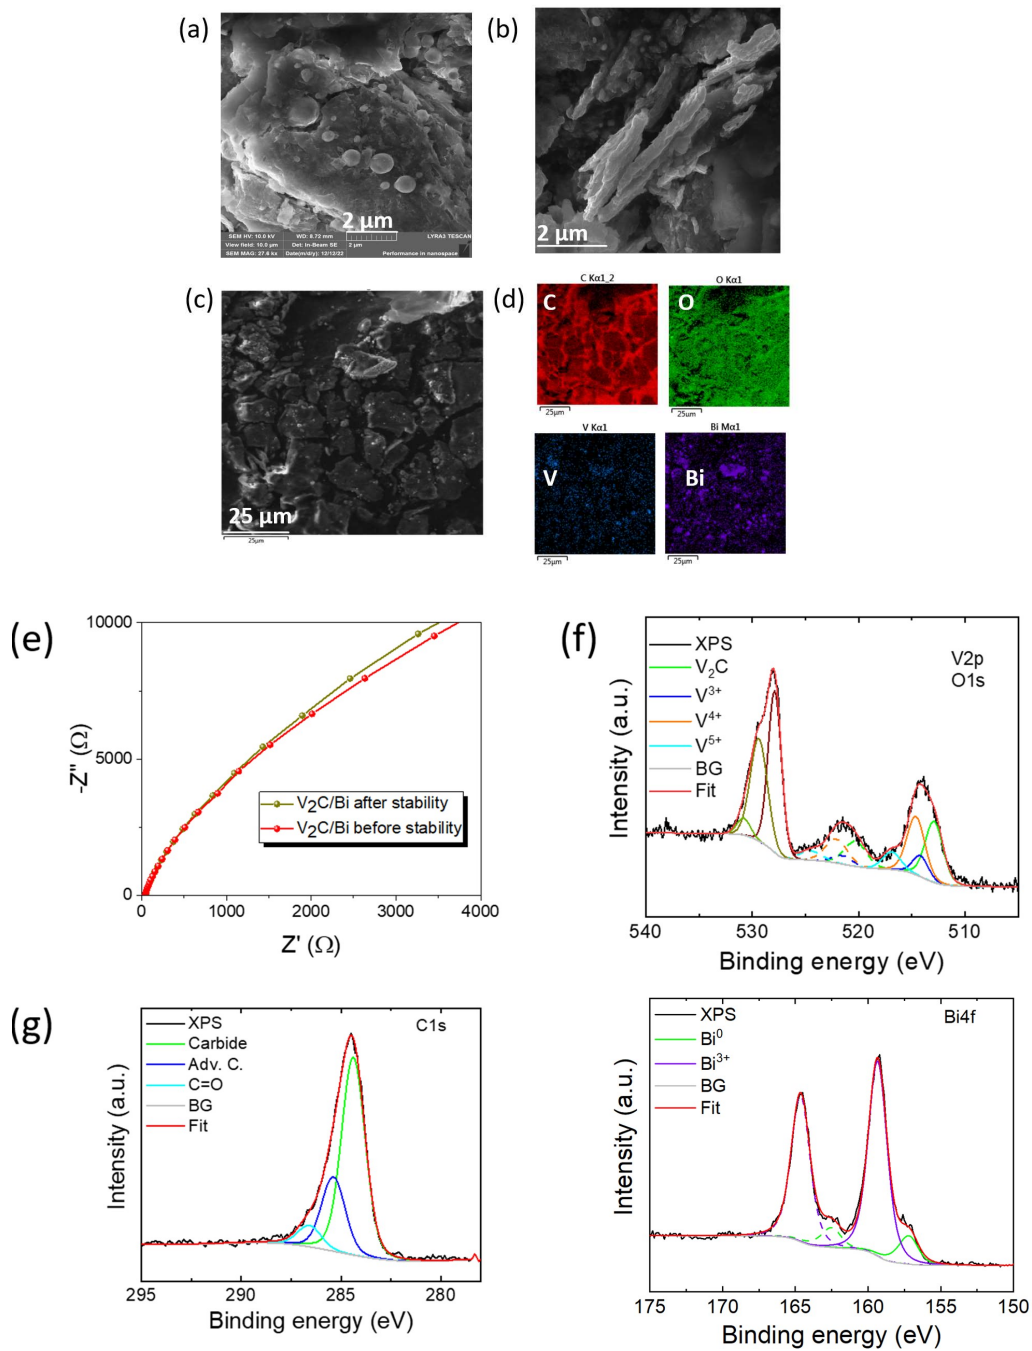

**Fig. S11** (a, b, c) SEM images of  $V_2C/Bi$  after the 24 h stability test and (d) the corresponding EDS element mapping, (e) The Nyquist plots of  $V_2C/Bi$  before and after stability, High-resolution XPS spectra of  $V_2C/Bi$  after NRR stability: (f) V 2p, (g) C 1s, and (h) Bi 4f.

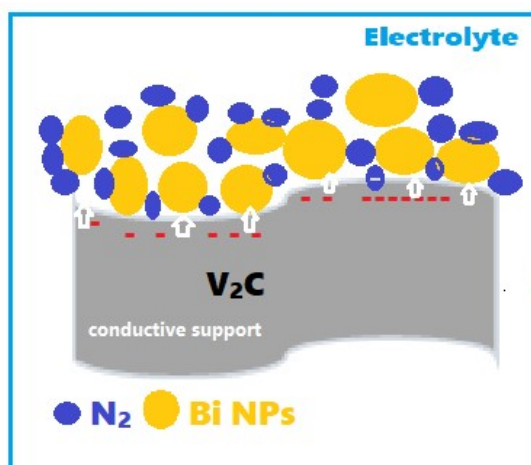

**Fig. S12** Schematic of electron transfer between Bi and V<sub>2</sub>C and adsorption sites of N<sub>2</sub>.

**Table S1** Elements detected from XPS measurement.

| Elements                               | V     | C    | O     | F    | Bi   |
|----------------------------------------|-------|------|-------|------|------|
| Atomic percent<br>V <sub>2</sub> C     | 17.36 | 37.5 | 26.3  | 18.5 | -    |
| Atomic percent<br>V <sub>2</sub> C/BVO | 11.8  | 24.4 | 43.6  | 8    | 11.2 |
| Atomic percent<br>V <sub>2</sub> C/Bi  | 11.54 | 26.8 | 43.77 | 11.3 | 6.8  |

**Table S2** comparison of  $\eta_{10}$  values with other non-noble metal catalysts.

| Catalysts                                                                                  | Overpotentials<br>(mV) | References                                    |
|--------------------------------------------------------------------------------------------|------------------------|-----------------------------------------------|
| <b>V<sub>2</sub>C/BVO</b>                                                                  | <b>384</b>             | <b>This work</b>                              |
| Se/Ti <sub>3</sub> C <sub>2</sub>                                                          | 712                    | 2D Mater. 9 (2022) 045019                     |
| Te / Ti <sub>3</sub> C <sub>2</sub>                                                        | 690                    | Nanoscale, 15 (2023) 4033–4044                |
| S/ Ti <sub>3</sub> C <sub>2</sub>                                                          | 830                    |                                               |
| Ni NPs@N-Nb <sub>2</sub> CT <sub>x</sub>                                                   | 720                    | Small 19 (2023) 2206098                       |
| MoS <sub>2</sub> /Ti <sub>3</sub> C <sub>2</sub>                                           | 400                    | Int. J. Hydrogen Energy 44 (2019) 965-976     |
| Nb <sub>4</sub> C <sub>3</sub> T <sub>x</sub> -180                                         | 398                    | Int. J. Hydrogen Energy 46 (2021) 1955-1966   |
| CoMoP@C                                                                                    | 448                    | Energy Environ. Sci. 10 (2017) 788            |
| VS <sub>2</sub> nanoflowers                                                                | 400                    | Int. J. Hydrogen Energy 43 (2018) 22949-22954 |
| Ti <sub>3</sub> C <sub>2</sub> flakes                                                      | 385                    | ACS Sustainable Chem. Eng. 6 (2018) 8976–8982 |
| Bi <sub>1.85</sub> Sr <sub>2</sub> Co <sub>1.85</sub> O <sub>7.7-<math>\delta</math></sub> | 589                    | ChemPhysChem 16 (2015) 769-774                |
| V <sub>2</sub> CT <sub>x</sub>                                                             | 618                    | Appl. Surf. Sci. 582 (2022) 152481            |
| VSe <sub>2</sub>                                                                           | 414                    | ACS Appl. Energy Mater. (2019) 644–653        |

**Table S3** Comparison of the electrocatalytic NRR performance of V<sub>2</sub>C/Bi with other NRR aqueous-based NRR electrocatalysts at ambient conditions.

| Catalyst                                                        | Electrolyte                               | NH <sub>3</sub> yield                                             | FE (%) | Ref.                              |
|-----------------------------------------------------------------|-------------------------------------------|-------------------------------------------------------------------|--------|-----------------------------------|
| V <sub>2</sub> C/Bi                                             | 0.1 M<br>KOH                              | 88.6 μg h <sup>-1</sup> cm <sup>-2</sup>                          | 8      | This work                         |
| Ni/Nb <sub>2</sub> C                                            | 0.1 M<br>KOH                              | 26.16 μg h <sup>-1</sup> cm <sup>-2</sup>                         | 7.3    | Ceram. Int. 2022, 48, 20599       |
| Cu/Ti <sub>3</sub> C <sub>2</sub>                               | 0.1 M<br>KOH                              | 3.04 μmol h <sup>-1</sup> cm <sup>-2</sup>                        | 7.31   | ChemPlusChem 2021, 86, 166        |
| Ti <sub>3</sub> C <sub>2</sub> T <sub>x</sub>                   | 0.01 M<br>Na <sub>2</sub> SO <sub>4</sub> | 2.81 × 10 <sup>-5</sup> μmol · s <sup>-1</sup> · cm <sup>-2</sup> | 7.4    | Nano Converg. 2021, 8, 14         |
| NS-Ti <sub>3</sub> C <sub>2</sub> T <sub>x</sub>                | 0.05 M<br>H <sub>2</sub> SO <sub>4</sub>  | 34.23 μg h <sup>-1</sup> mg <sup>-1</sup> <sub>cat</sub>          | 6.6    | J. Alloys Comp. 2021, 869, 159335 |
| V <sub>2</sub> CT <sub>x</sub>                                  | 0.1 M<br>Na <sub>2</sub> SO <sub>4</sub>  | 12.6 μg h <sup>-1</sup> cm <sup>-2</sup>                          | 4      | Catal. Lett. 2021, 151, 3516      |
| TiO <sub>2</sub> /Ti <sub>3</sub> C <sub>2</sub> T <sub>x</sub> | 0.1M HCl                                  | 26.32 μg h <sup>-1</sup> mg <sup>-1</sup> <sub>cat</sub>          | 8.42   | Inorg. Chem. 2019, 58, 5414       |
| V <sub>2</sub> CT <sub>x</sub>                                  | 0.1M HCl                                  | 25.1 μg h <sup>-1</sup> mg <sup>-1</sup> <sub>cat</sub>           | 11.7   | Catal. Lett. 2021, 151, 3516      |

|                                                                               |                                          |                                                         |       |                                      |
|-------------------------------------------------------------------------------|------------------------------------------|---------------------------------------------------------|-------|--------------------------------------|
| Ti <sub>3</sub> C <sub>2</sub> T <sub>x</sub>                                 | 0.1 M<br>H <sub>2</sub> SO <sub>4</sub>  | 20.4 μg h <sup>-1</sup> mg <sup>-1</sup> <sub>cat</sub> | 9.3   | J. Mater. Chem. A, 2018, 6,<br>24031 |
| MnO <sub>2</sub> /Ti <sub>3</sub> C <sub>2</sub> T <sub>x</sub>               | 0.1 M HCl                                | 34.12 μg h <sup>-1</sup> cm <sup>-2</sup>               | 11.39 | Mater. Chem. A, 2019, 7,<br>18823    |
| Ti <sub>3</sub> C <sub>2</sub> T <sub>x</sub><br>/FeOOH                       | 0.5 M<br>Li <sub>2</sub> SO <sub>4</sub> | 0.26 μg h <sup>-1</sup> cm <sup>-2</sup>                | 5.78  | Joule 2019, 3, 279                   |
| Mn <sub>3</sub> O <sub>4</sub> /Ti <sub>3</sub> C <sub>2</sub> T <sub>x</sub> | 0.1 M<br>Na <sub>2</sub> SO <sub>4</sub> | 25.95 μg h <sup>-1</sup> cm <sup>-2</sup>               | 5.51  | Chem. Eng. J., 2020, 396             |
| RuFe@Ti <sub>3</sub> C <sub>2</sub> T <sub>x</sub>                            | 0.1 M<br>KOH                             | 40.79 μg h <sup>-1</sup> cm <sup>-2</sup>               | 15.25 | ChemCatChem 2022, 14,<br>e202101775  |
